# Supplementary material for: Structural basis of ligand activation and inhibition in a mammalian TRPV4 ion channel
Source: PubMed Central journal article supplement (PMC10333285; doi:10.1038/s41421-023-00579-3), 2023-07-10
Supplement: 41421_2023_579_MOESM1_ESM.pdf [file 41421_2023_579_MOESM1_ESM.pdf]

## 1 **Supplementary information**

### 2 **Materials and Methods**

#### 3 **Protein expression and purification**

4 mTRPV4<sub>apo</sub>, mTRPV4<sub>GSK</sub>, mTRPV4<sub>GSK\_RR</sub>, mTRPV4<sub>Agonist1\_RR</sub> and mTRPV4<sub>RN1747</sub> were  
5 cloned, expressed, and purified following similar procedures. The *mouse TRPV4* gene  
6 fragment encoding residues 137-801 containing an N-terminal Flag and Strep tag II was  
7 cloned into a pEG-BM vector. This truncated TRPV4 exhibited similar ligand activation by  
8 GSK101 as the wildtype (full length) channel (Fig. S12), so we used this truncated TRPV4  
9 for protein expression. All TRPV4s were heterologously expressed in Human Embryonic  
10 Kidney (HEK) 293F GnT1<sup>-</sup> suspension cells (Life Technologies) using the BacMam system  
11 (Thermo Fisher Scientific). The P2 baculovirus generated in Sf9 cells (Life Technologies)  
12 following standard protocol was used to transfect HEK 293F GnT1<sup>-</sup> cells at a ratio of 1:10  
13 (virus: HEK293F, v/v) when the cell density is around 4×10<sup>6</sup> cells/mL. 10 mM sodium  
14 butyrate was added 12 h post-transduction, and cells were maintained at 30 °C to enhance  
15 protein expression. Cells were harvested by centrifugation at 4,000 rpm, and then flash-  
16 frozen in liquid nitrogen and stored at -80 °C.

17 The cell pellet was resuspended in lysis buffer A (20 mM Tris pH 8.0, 150 mM NaCl)  
18 supplemented with a protease inhibitor cocktail (2 µg/ml DNase I, 0.5 µg/ml pepstatin, 2  
19 µg/ml leupeptin, 1 µg/ml aprotinin, and 100 µM phenylmethylsulfonyl fluoride) and  
20 homogenized by sonication on ice. mTRPV4 protein was extracted with 1% (w:v) n-  
21 Dodecyl-β-D-Maltopyranoside (DDM, Anatrace) by gentle agitation for 3 hours at 4 °C.  
22 After extraction, the supernatant was collected following a 1-hour ultra-centrifugation at  
23 20000 rpm and then incubated gently with 0.5 mL Strep-Tactin Sepharose resin (IBA) at  
24 4 °C. After 1 hour, the resin was collected on a gravity column (Bio-Rad) and washed in  
25 buffer B (buffer A + 0.03% GDN) for 20 column volumes. The detergent was then changed  
26 to 0.03% glyco-diosgenin (GDN, Anatrace), and the protein sample was eluted with 10 mM  
27 desthiobiotin (Sigma) in buffer C (buffer B + 10 mM desthiobiotin). The protein sample was  
28 further purified by size-exclusion chromatography on a Superose 6 10/300 GL column (GE  
29 Healthcare) pre-equilibrated with buffer B (20 mM Tris pH 8.0, 150 mM NaCl, 0.03% GDN).  
30 The peak fraction of TRPV4 was collected and concentrated in a 100-kDa concentrator  
31 (Amicon Ultra, Millipore Sigma) to appropriate concentrations (5 mg/ml) for cryo-EM  
32 analysis.

#### 34 **Reconstitution of TRPV4 into nanodisc**

35 Membrane scaffold protein (MSP1E3D1) was expressed and purified from *Escherichia coli*.  
36 1-palmitoyl-2-oleoyl-sn-glycero-3-phosphocholine (POPC) solubilized in chloroform  
37 (Avanti) was dried and dissolved in 3% DDM buffer thoroughly at a concentration of 15 mM.  
38 After eluted, TRPV4 was concentrated down to approximately 1 ml and mixed with lipid  
39 and MSP1E3D1 at a molar ratio of 1:10:2 (TRPV4: POPC: MSP1E3D1). The mixture was  
40 equilibrated at 4 °C for one hour and then added Bio-beads SM2 (Bio-Rad) two times within  
41 16 h to gradually remove detergents. The reconstituted protein was separated from empty  
42 nanodisc by size-exclusion chromatography on a Superose 6 10/300 GL column pre-  
43 equilibrated with buffer D (20 mM Tris pH 8.0, 150 mM NaCl). The peak fractions were

44 collected and concentrated to 5 mg/ml for cryo-EM analysis.

45

#### 46 **Cryo-EM sample preparation and data acquisition**

47 The cryo-EM data of all TRPV4 structures in either detergent (mTRPV4<sub>apo</sub>, mTRPV4<sub>GSK</sub>,  
48 mTRPV4<sub>RN1747</sub>) or nanodisc (mTRPV4<sub>GSK\_RR</sub> and mTRPV4<sub>Agonist1\_RR</sub>) was collected at  
49 Center of Cryo-Electron Microscopy at Zhejiang University. For the sample of mTRPV4<sub>GSK</sub>,  
50 GSK101 was added to the sample of mTRPV4<sub>GSK</sub> to a final concentration of 100  $\mu$ M. For  
51 the sample of mTRPV4<sub>GSK\_RR</sub>, RR was added to the sample of TRPV4<sub>GSK</sub> to a final  
52 concentration of 500  $\mu$ M. For the sample of mTRPV4<sub>Agonist1\_RR</sub>, Agonist1 was added to the  
53 sample of mTRPV4<sub>apo</sub> to a final concentration of 100  $\mu$ M, RR was added to the sample to  
54 a final concentration of 500  $\mu$ M. For the sample of mTRPV4<sub>RN1747</sub>, RN1747 was added to  
55 the sample of mTRPV4<sub>RN1747</sub> to a final concentration of 100  $\mu$ M. The cryo-EM grids were  
56 prepared by applying 3  $\mu$ l of TRPV4 protein sample to a glow-discharged holey carbon grid  
57 (Quantifoil Cu R1.2/1.3, 300 mesh) and blotted for 4.5 seconds under 100% humidity at  
58 4 °C before being plunged into liquid ethane using a Mark IV Vitrobot (FEI).

59 Micrographs of mTRPV4<sub>apo</sub>, mTRPV4<sub>GSK</sub>, mTRPV4<sub>GSK\_RR</sub>, mTRPV4<sub>Agonist1\_RR</sub> and  
60 mTRPV4<sub>RN1747</sub> were acquired on a Titan Krios microscope (FEI) operated at 300 kV  
61 equipped with the Selectris energy filter and Falcon4 detector. EPU software was used for  
62 automated data collection following standard procedures. A calibrated magnification of  
63  $\times 140,000$  was used for imaging, yielding a pixel size of 0.93 Å on images. The defocus  
64 range was set from  $-0.8$  to  $-1.6$   $\mu$ m. Each micrograph was dose-fractionated to 40 frames  
65 under a dose rate of 7.49 e<sup>-</sup>/pixel/s, with a total exposure time of 6 s, resulting in a total  
66 dose of about 52 e<sup>-</sup>/Å<sup>2</sup>.

67

#### 68 **Image processing**

69 For all datasets, motion correction, CTF estimation, particle picking, particle extraction and  
70 particle polishing were performed in Relion(version-4.0). Other data processes were  
71 performed using cryoSPARC (version-3.3.2).

72 For mTRPV4<sub>apo</sub>, 2,812,534 particles were automatically picked from 3,001 images and  
73 after three rounds heterogeneous 3D refinement, 91,328 good-quality particles were finally  
74 selected for non-uniform 3D refinement with C4 symmetry and generated reconstruction  
75 map at 3.6 Å resolution with a B-factor of 106 Å<sup>2</sup>.

76 For mTRPV4<sub>GSK</sub>, 2,392,714 particles were initially extracted from 3,032 images. After  
77 2D classification, ab initio reconstruction, and two rounds heterogeneous 3D refinement,  
78 234,637 good-quality particles were selected for non-uniform 3D refinement with C4  
79 symmetry and generated reconstruction map at 3.6 Å resolution with a B-factor of 135 Å<sup>2</sup>.

80 For mTRPV4<sub>GSK\_RR</sub>, 2,296,249 particles automatically picked from 2,985 images were  
81 performed three rounds heterogeneous 3D refinement. Finally 133,030 good-quality  
82 particles were selected for non-uniform 3D refinement with C4 symmetry and generated  
83 reconstruction map at 3.7 Å resolution with a B-factor of 111 Å<sup>2</sup>.

84 For mTRPV4<sub>Agonist1\_RR</sub>, 1,527,550 particles were automatically picked from 2,403  
85 images and subjected to seven rounds heterogeneous 3D refinement. Finally 162,371  
86 good-quality particles were selected for non-uniform 3D refinement with C4 symmetry and  
87 generated reconstruction map at 3.9 Å resolution with a B-factor of 143 Å<sup>2</sup>.

88 For mTRPV4<sup>RN1747</sup>, 622,583 particles were automatically picked from 2,001 images  
89 and subjected to heterogeneous 3D refinement. To generate the templates for template-  
90 based particle picking, after the first round of 2D classification, the 2D class of TRPV4 side-  
91 view was selected and used as the template. We have used the tool “Remove Duplicate  
92 Particles” in the Cryosparc software to deal with the duplication of the combined particles.  
93 Finally 74,344 good-quality particles were selected for non-uniform 3D refinement with C4  
94 symmetry and generated reconstruction map at 3.8 Å resolution with a B-factor of 150 Å<sup>2</sup>.

### 95 96 **Model building, refinement, and validation**

97 De novo atomic model building was performed in Coot based on the 3.59 Å resolution  
98 density map of mTRPV4<sub>apo</sub>. The mTRPV4<sub>apo</sub> atomic model building using the hTRPV4  
99 (PDB: 7AA5) model as a starting template. The amino acid assignment was achieved  
100 based on the clearly defined density for bulky residues (Phe, Trp, Tyr, and Arg). Models  
101 were refined against summed maps using real-space refinement in PHENIX<sup>1</sup>, with  
102 secondary structure restraints and non-crystallography symmetry applied. The initial EM  
103 density map allowed us to construct an mTRPV4<sub>apo</sub> model containing residues 148–638  
104 and 649–786. The model of all other TRPV4 structure was built using the model of  
105 mTRPV4<sub>apo</sub> as a template. The Van der Waals radii of the pore were calculated using  
106 HOLE<sup>2</sup>. All figures were prepared in PyMol<sup>3</sup>, Chimera<sup>4</sup>, or Coot<sup>5</sup>.

### 107 108 **Chemicals**

109 GSK1016790A, TRPV4 agonist-1 free base and RN-1747 were purchased from MCE.  
110 Ruthenium Red was purchased from Shanghai yuanye.

### 111 112 **Cell culture for electrophysiology**

113 HEK293T cells are cultured using DMEM medium contained 10% FBS in a cell incubator  
114 with 5% CO<sub>2</sub> at 37 °C. Plasmids of mTRPV4 are labeled with YFP as indicators for  
115 subsequent electrophysiological recordings. cDNA constructs of these ion channels were  
116 transiently transfected with Lipofectamine 2000 (Invitrogen, Carlsbad, CA). And one or two  
117 days after transient transfection, electrophysiological recordings were performed.

118 Site mutations of mTRPV4 were generated by Fast Mutagenesis Kit (Vazyme).  
119 Primers used to generate point mutations are summarized in Supplementary information,  
120 Table S5. All mutations were confirmed by sequencing.

### 121 122 **Electrophysiology**

123 Patch-clamp recordings were carried out with a HEKA EPC10 amplifier controlled by  
124 PatchMaster software (HEKA). Patch pipettes were prepared from borosilicate glass and  
125 fire-polished to resistance of 3~8 MΩ by P-97 puller for whole-cell recordings. Both bath  
126 solution and pipette solution contained 130 mM NaCl, 10 mM glucose, 0.2 mM EDTA, and  
127 3 mM Hepes and were adjusted to pH 7.2 ~ 7.4 with NaOH for whole-cell recordings.  
128 Whole-cell recordings were performed at ±80 mV. Current was sampled at 10 kHz and  
129 filtered at 2.9 kHz. All recordings were performed at room temperature (25°C) with the  
130 maximum variation of 1 °C.

131 A gravity-driven system (RSC-200, Bio-Logic) with freely rotated perfusion tubes was

132 used for the perfusion of ligands. Bath and ligand solution were delivered through separate  
133 tubes to minimize the mixing of solutions. Patch pipette holding cells was placed in front of  
134 the perfusion tube outlet for perfusion.

135

### 136 **Molecular dynamic simulation**

137 Starting from mTRPV4<sub>GSK101</sub> and mTRPV4<sub>Agonist1\_RR</sub> structures, two MD simulation systems  
138 were set up with the proteins embedded in 1-palmitoyl- 2-oleoyl-sn-glycero-3-phosphocholine  
139 (POPC) bilayer with CHARMM-GUI<sup>6,7</sup>. The systems were solvated in 0.15 M NaCl solution with  
140 a total of ~ 5480,000 atoms in a cubic box of 150Å×150Å×140Å. Simulations were performed  
141 using OpenMM with the CHARMM36 force field<sup>8,9</sup> and TIP3P water model<sup>10</sup>. The system was  
142 equilibrated in six steps with gradually decreasing restraining force constants on the protein.  
143 Gradually reduced constraints were applied during the equilibration. Three repeats of 200 ns  
144 unrestrained atomistic simulations were then performed for each system, respectively. The  
145 Particle Mesh Ewald (PME) method<sup>11</sup> was used to model the long-range electrostatics (< 1 nm).  
146 Temperature coupling was done with V-rescale thermostat<sup>12</sup> at 293 K. The Parrinello-Rahman  
147 barostat<sup>13</sup> with a reference pressure of 1 bar and a compressibility of 4.5e-5 bar was applied  
148 for pressure control. Covalent bonds are constrained to their equilibrium length by the LINCS  
149 algorithm<sup>14</sup> to allow a 2 fs integration steps for production runs. The visualization and analysis  
150 were performed using VMD<sup>4</sup>.

151

### 152 **Data analysis**

153 Data from whole-cell recordings were analyzed in Igor Pro version 6.11 (WaveMatrix). Hill  
154 Equation was used to fit the concentration-response curves for the calculation of EC50 and  
155 IC50.

156

### 157 **References**

- 158 1 Adams, P. D. *et al.* PHENIX: a comprehensive Python-based system for macromolecular  
159 structure solution. *Acta Crystallogr D Biol Crystallogr* **66**, 213-221,  
160 doi:10.1107/S0907444909052925 (2010).
- 161 2 Smart, O. S., Goodfellow, J. M. & Wallace, B. A. The pore dimensions of gramicidin A.  
162 *Biophys J* **65**, 2455-2460, doi:10.1016/S0006-3495(93)81293-1 (1993).
- 163 3 Schrodinger, LLC. *The PyMOL Molecular Graphics System, Version 1.8* (2015).
- 164 4 Pettersen, E. F. *et al.* UCSF Chimera--a visualization system for exploratory research and  
165 analysis. *Journal of computational chemistry* **25**, 1605-1612, doi:10.1002/jcc.20084 (2004).
- 166 5 Emsley, P., Lohkamp, B., Scott, W. G. & Cowtan, K. Features and development of Coot.  
167 *Acta crystallographica. Section D, Biological crystallography* **66**, 486-501,  
168 doi:10.1107/S0907444910007493 (2010).
- 169 6 Jo, S., Kim, T., Iyer, V. G. & Im, W. CHARMM-GUI: a web-based graphical user interface  
170 for CHARMM. *Journal of computational chemistry* **29**, 1859-1865, doi:10.1002/jcc.20945  
171 (2008).
- 172 7 Lee, J. *et al.* CHARMM-GUI Input Generator for NAMD, GROMACS, AMBER, OpenMM,  
173 and CHARMM/OpenMM Simulations Using the CHARMM36 Additive Force Field. *Journal*  
174 *of Chemical Theory and Computation* **12**, 405-413, doi:10.1021/acs.jctc.5b00935 (2016).
- 175 8 Huang, J. & MacKerell, A. D., Jr. CHARMM36 all-atom additive protein force field:

176 validation based on comparison to NMR data. *J Comput Chem* **34**, 2135-2145,  
177 doi:10.1002/jcc.23354 (2013).

178 9 Klauda, J. B. *et al.* Update of the CHARMM All-Atom Additive Force Field for Lipids:  
179 Validation on Six Lipid Types. *The Journal of Physical Chemistry B* **114**, 7830-7843,  
180 doi:10.1021/jp101759q (2010).

181 10 Jorgensen, W. L., Chandrasekhar, J., Madura, J. D., Impey, R. W. & Klein, M. L. Comparison  
182 of simple potential functions for simulating liquid water. *The Journal of chemical physics*  
183 **79**, 926-935, doi:10.1063/1.445869 (1983).

184 11 Essmann, U. *et al.* A smooth particle mesh Ewald method. *The Journal of chemical physics*  
185 **103**, 8577-8593, doi:10.1063/1.470117 (1995).

186 12 Bussi, G., Donadio, D. & Parrinello, M. Canonical sampling through velocity rescaling. *The*  
187 *Journal of chemical physics* **126**, 014101, doi:10.1063/1.2408420 (2007).

188 13 Parrinello, M. & Rahman, A. Polymorphic transitions in single crystals: A new molecular  
189 dynamics method. *Journal of Applied Physics* **52**, 7182-7190, doi:10.1063/1.328693  
190 (1981).

191 14 Hess, B., Bekker, H., Berendsen, H. J. C. & Fraaije, J. G. E. M. LINCS: A linear constraint  
192 solver for molecular simulations. *Journal of Computational Chemistry* **18**, 1463-1472,  
193 doi:[https://doi.org/10.1002/\(SICI\)1096-987X\(199709\)18:12<1463::AID-JCC4>3.0.CO;2-H](https://doi.org/10.1002/(SICI)1096-987X(199709)18:12<1463::AID-JCC4>3.0.CO;2-H)  
194 (1997).

## Supplementary information, Figures

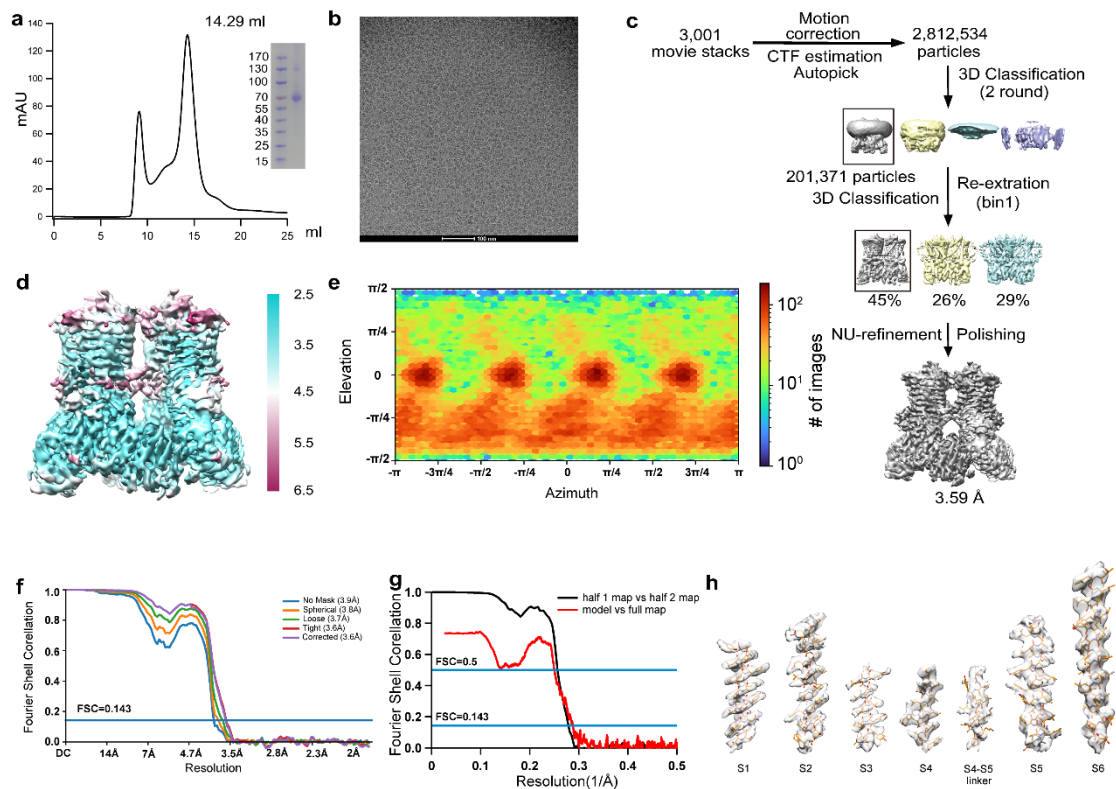

196 **Figure S1. Structure determination of mTRPV4<sub>apo</sub>.** **a** Size-exclusion chromatography of  
 197 mTRPV4<sub>apo</sub> on Superose 6 (GE Healthcare) and SDS-PAGE analysis of the final sample.  
 198 **b** Representative cryo-EM micrograph of mTRPV4<sub>apo</sub>. **c** Flowchart of image processing for  
 199 mTRPV4<sub>apo</sub> particles. **d** The density map of mTRPV4<sub>apo</sub> colored by local resolution (Å). **e**  
 200 Distribution of orientations over azimuth and elevation angles for particles included in the  
 201 calculation of the final map. **f** The Gold standard Fourier Shell Correlation (FSC) curve of  
 202 the final 3D reconstruction of mTRPV4<sub>apo</sub> with different masking, as calculated in  
 203 cryoSPARC. **g** The FSC curves of the final 3D reconstruction of mTRPV4<sub>apo</sub>, and the FSC  
 204 curve for cross-validation between the map and the model of mTRPV4<sub>apo</sub>. **h** Sample maps  
 205 of six transmembrane helices (TMs) in mTRPV4<sub>apo</sub>.  
 206

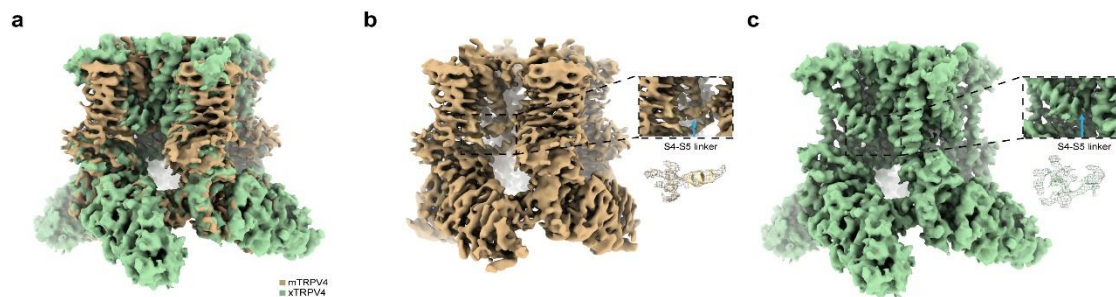

207 **Figure S2. 3D reconstruction of mTRPV4 compared to xTRPV4.** **a** 3D reconstruction  
 208 of mTRPV4 compared to xTRPV4 in the apo state. **b** 3D reconstruction of mTRPV4 in the  
 209 apo state. The electron density of S4-S5 linker of mTRPV4 is shown in an enlarged view.  
 210 **c** 3D reconstruction of xTRPV4 in the apo state. The electron density of S4-S5 linker of  
 211 xTRPV4 is shown in an enlarged view.

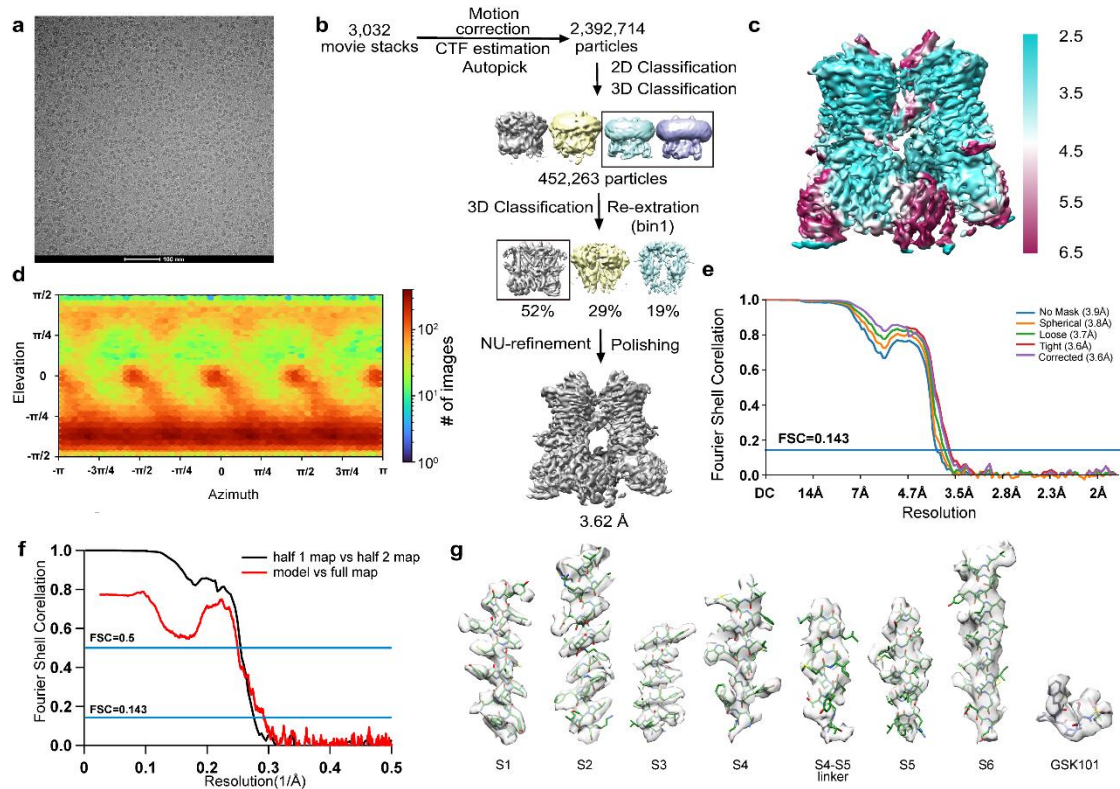

212 **Figure S3. Structure determination of mTRPV4<sub>GSK101</sub>.** **a** Representative cryo-EM  
 213 micrograph of mTRPV4<sub>GSK101</sub>. **b** Flowchart of image processing for mTRPV4<sub>GSK101</sub> particles.  
 214 **c** The density map of mTRPV4<sub>GSK101</sub> colored by local resolution (Å). **d** Distribution of  
 215 orientations over azimuth and elevation angles for particles included in the calculation of  
 216 the final map. **e** The Gold standard Fourier Shell Correlation (FSC) curve of the final 3D  
 217 reconstruction of mTRPV4<sub>GSK101</sub> with different masking, as calculated in cryoSPARC. **f** The  
 218 FSC curves of the final 3D reconstruction of mTRPV4<sub>GSK101</sub>, and the FSC curve for cross-  
 219 validation between the map and the model of mTRPV4<sub>GSK101</sub>. **g** Sample maps of six  
 220 transmembrane helices (TMs) in mTRPV4<sub>GSK101</sub>. The density corresponding to GSK101 is  
 221 also shown.



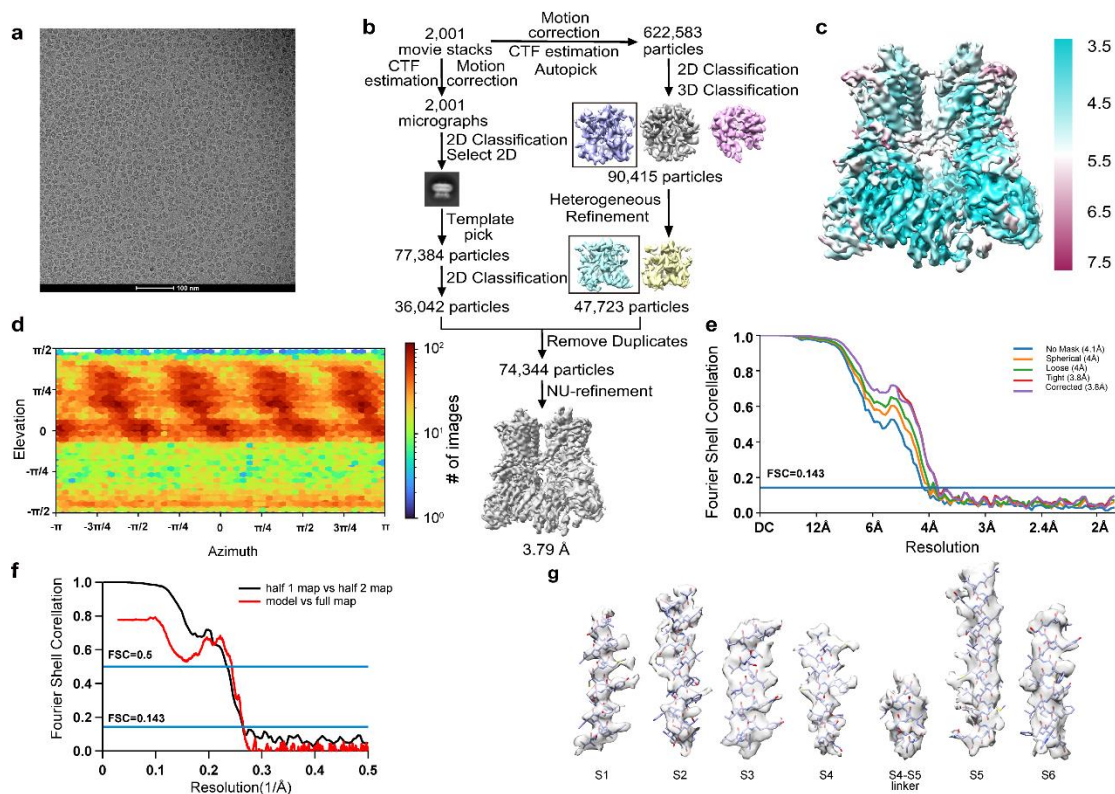

222 **Figure S4. Structure determination of mTRPV4<sup>RN1747</sup>.** **a** Representative cryo-EM  
 223 micrograph of mTRPV4<sup>RN1747</sup>. **b** Flowchart of image processing for mTRPV4<sup>RN1747</sup>  
 224 particles. **c** The density map of mTRPV4<sup>RN1747</sup> colored by local resolution (Å). **d** Distribution  
 225 of orientations over azimuth and elevation angles for particles included in the calculation  
 226 of the final map. **e** The Gold standard Fourier Shell Correlation (FSC) curve of the final 3D  
 227 reconstruction of mTRPV4<sup>RN1747</sup> with different masking, as calculated in cryoSPARC. **f** The  
 228 FSC curves of the final 3D reconstruction of mTRPV4<sup>RN1747</sup>, and the FSC curve for cross-  
 229 validation between the map and the model of mTRPV4<sup>RN1747</sup>. **g** Sample maps of six  
 230 transmembrane helices (TMs) in mTRPV4<sup>RN1747</sup>.  
 231

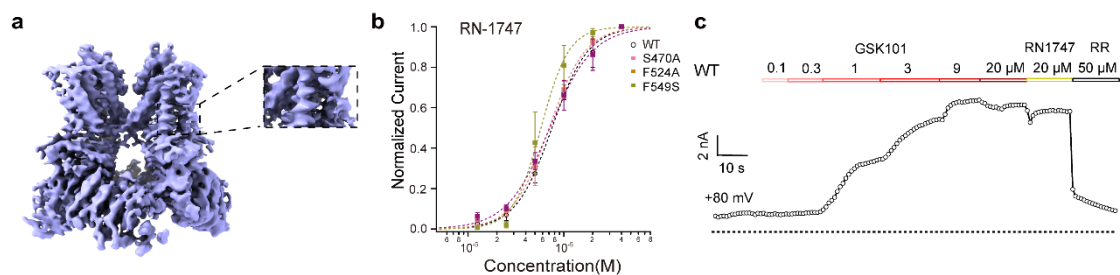

232 **Figure S5. RN-1747 does not bind to the pocket of GSK101 or Agonist-1.** **a** 3D  
 233 reconstruction of mTRPV4<sup>RN1747</sup>. RN-1747 is not observed in the binding site of GSK101  
 234 and Agonist-1, which is shown in an enlarged view. **b** Concentration-response curves of  
 235 RN-1747 activation of WT and mutants from the membrane in whole-cell patch-clamp  
 236 recordings (n = 3–4 cells). Data presented as mean ± s.e.m. **c** Representative current  
 237 recordings of WT mTRPV4, GSK101-activated current is normalized by RN-1747-activated  
 238 current.  
 239



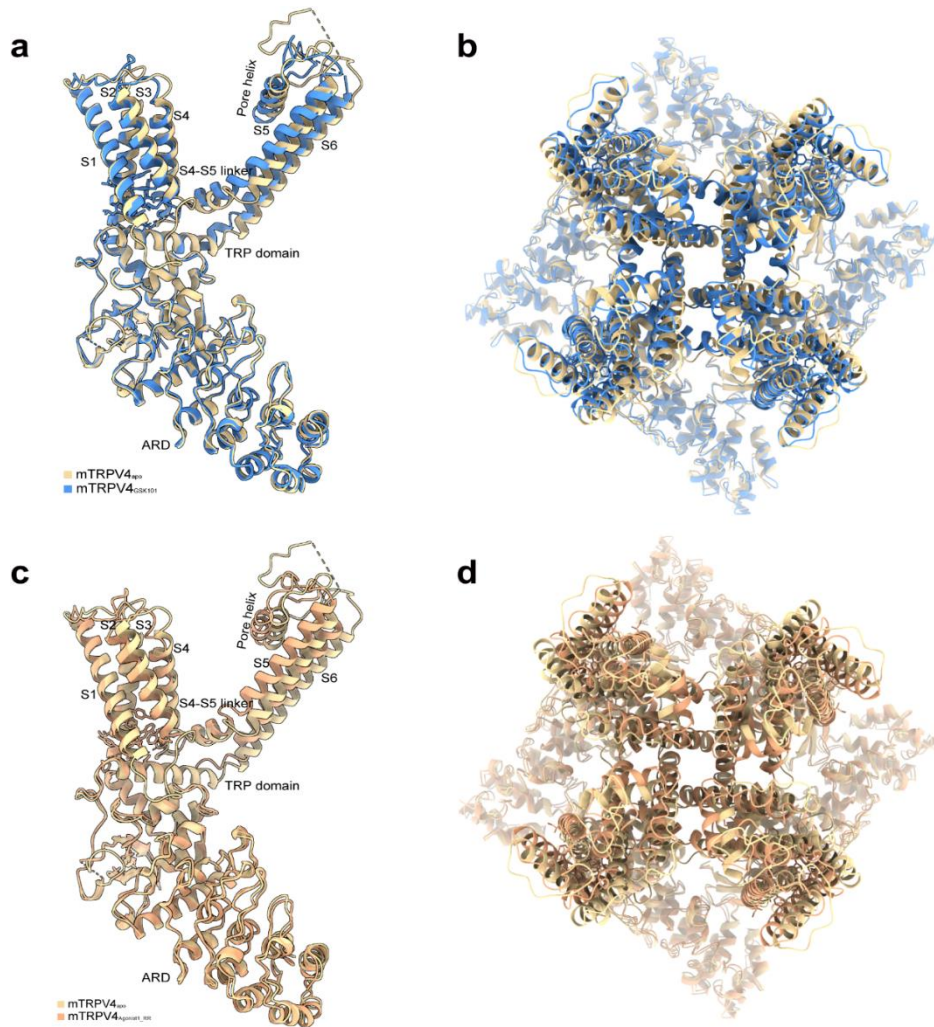

240 **Figure S6. Conformational changes of mTRPV4<sub>apo</sub> compared to mTRPV4<sub>GSK</sub> and**  
 241 **mTRPV4<sub>Agonist1\_RR</sub>.** **a** Side view of the conformational changes of mTRPV4<sub>GSK</sub> compared  
 242 with mTRPV4<sub>apo</sub>. Only one subunit was shown for clarity. **b** Top view from the extracellular  
 243 side of the conformational changes of mTRPV4<sub>GSK</sub> compared with mTRPV4<sub>apo</sub>. **c** Side view  
 244 of the conformational changes of mTRPV4<sub>Agonist1\_RR</sub> compared with mTRPV4<sub>apo</sub>. Only one  
 245 subunit was shown for clarity. **d** Top view from the extracellular side of the conformational  
 246 changes of mTRPV4<sub>Agonist1\_RR</sub> compared with mTRPV4<sub>apo</sub>.  
 247

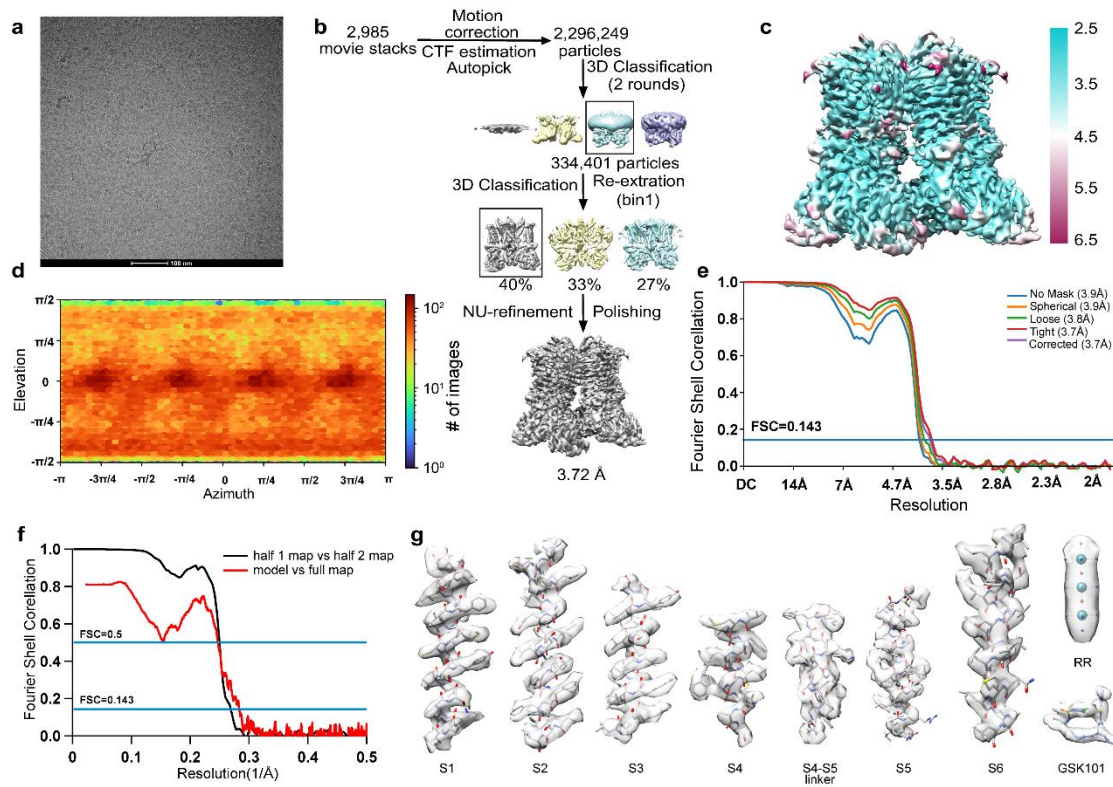

248  
 249  
 250  
 251  
 252  
 253  
 254  
 255  
 256  
 257  
 258

**Figure S7. Structure determination of mTRPV4<sub>GSK101\_RR</sub>.** **a** Representative cryo-EM micrograph of mTRPV4<sub>GSK101\_RR</sub>. **b** Flowchart of image processing for mTRPV4<sub>GSK101\_RR</sub> particles. **c** The density map of mTRPV4<sub>GSK101\_RR</sub> colored by local resolution (Å). **d** Distribution of orientations over azimuth and elevation angles for particles included in the calculation of the final map. **e** The Gold standard Fourier Shell Correlation (FSC) curve of the final 3D reconstruction of mTRPV4<sub>GSK101\_RR</sub> with different masking, as calculated in cryoSPARC. **f** The FSC curves of the final 3D reconstruction of mTRPV4<sub>GSK101\_RR</sub>, and the FSC curve for cross-validation between the map and the model of mTRPV4<sub>GSK101\_RR</sub>. **g** Sample maps of six transmembrane helices (TMs) in mTRPV4<sub>GSK101\_RR</sub>. The density corresponding to GSK101 and Ruthenium Red is also shown.

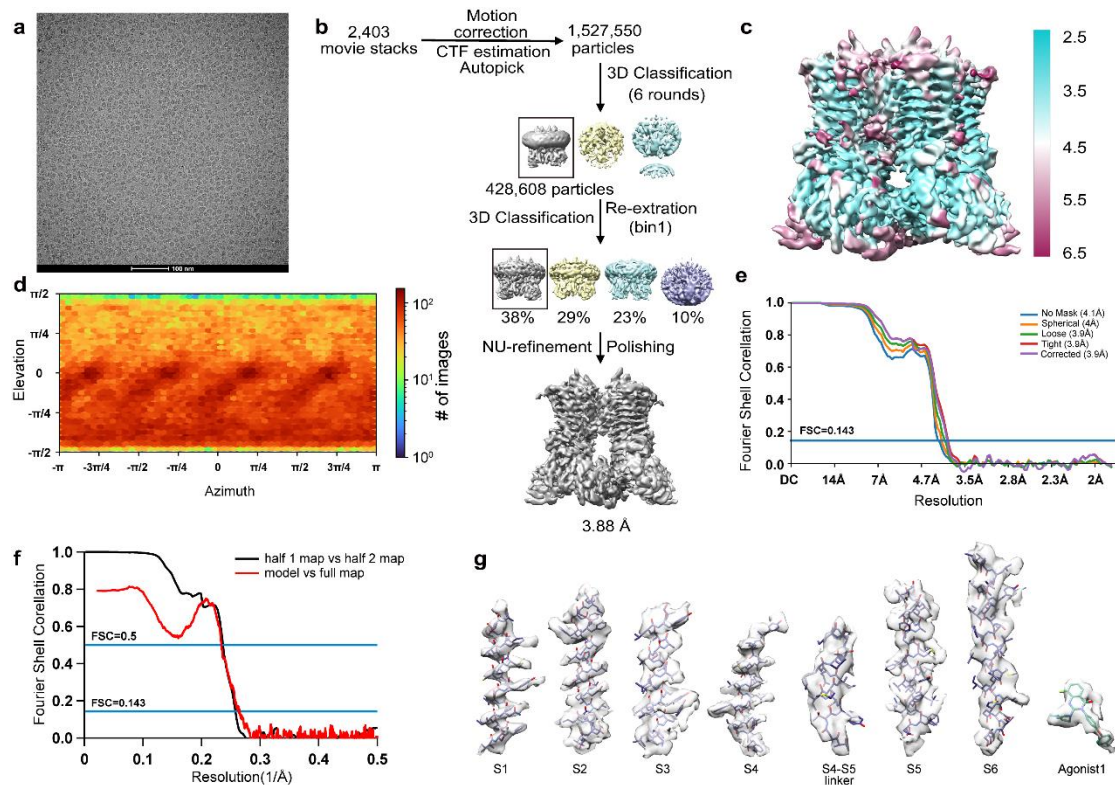

259 **Figure S8. Structure determination of mTRPV4<sub>Agonist1\_RR</sub>.** **a** Representative cryo-EM  
 260 micrograph of mTRPV4<sub>Agonist1\_RR</sub>. **b** Flowchart of image processing for mTRPV4<sub>Agonist1\_RR</sub>  
 261 particles. **c** The density map of mTRPV4<sub>Agonist1\_RR</sub> colored by local resolution (Å). **d**  
 262 Distribution of orientations over azimuth and elevation angles for particles included in the  
 263 calculation of the final map. **e** The Gold standard Fourier Shell Correlation (FSC) curve of  
 264 the final 3D reconstruction of mTRPV4<sub>Agonist1\_RR</sub> with different masking, as calculated in  
 265 cryoSPARC. **f** The FSC curves of the final 3D reconstruction of mTRPV4<sub>Agonist1\_RR</sub>, and the  
 266 FSC curve for cross-validation between the map and the model of mTRPV4<sub>Agonist1\_RR</sub>. **g**  
 267 Sample maps of six transmembrane helices (TMs) in mTRPV4<sub>Agonist1\_RR</sub>. The density  
 268 corresponding to Agonist1 is also shown.

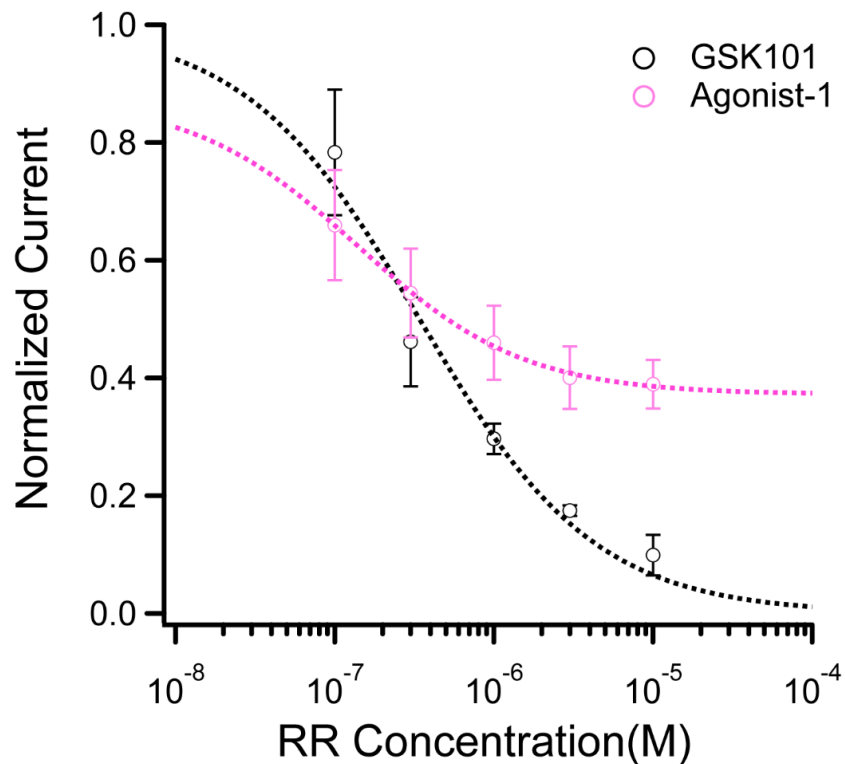

269 **Figure S9. Electrophysiological characterization of Ruthenium Red inhibition in**  
 270 **mTRPV4 channels activated by GSK101 and Agonist-1, respectively.** Concentration-  
 271 response curves of Ruthenium Red inhibition in WT mTRPV4 activated by GSK101 and  
 272 Agonist-1 respectively in whole-cell patch-clamp recordings (n=3–4 cells). Data are  
 273 presented as mean  $\pm$  s.e.m.

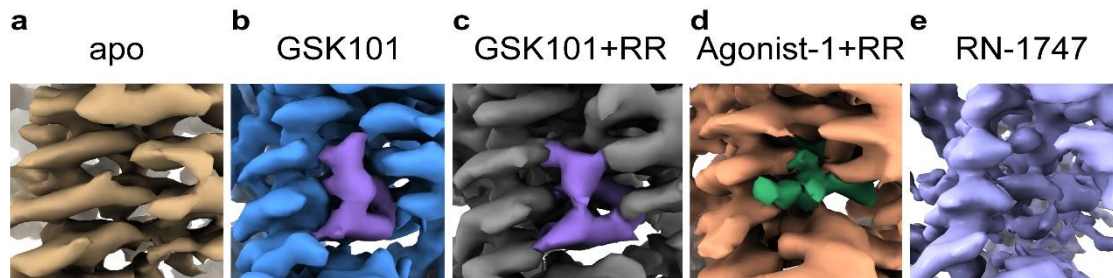

274 **Figure S10. Close-up view at the ligand binding site of 3D reconstructions of**  
 275 **mTRPV4.** **a** Close-up view at the ligand binding site of 3D reconstructions of mTRPV4<sub>apo</sub>.  
 276 **b** Close-up view at the ligand binding site of 3D reconstructions of mTRPV4<sub>GSK101</sub>. **c** Close-  
 277 up view at the ligand binding site of 3D reconstructions of mTRPV4<sub>GSK101\_RR</sub>. **d** Close-up  
 278 view at the ligand binding site of 3D reconstructions of mTRPV4<sub>Agonist1\_RR</sub>. **e** Close-up view  
 279 at the ligand binding site of 3D reconstructions of mTRPV4<sub>RN1747</sub>.



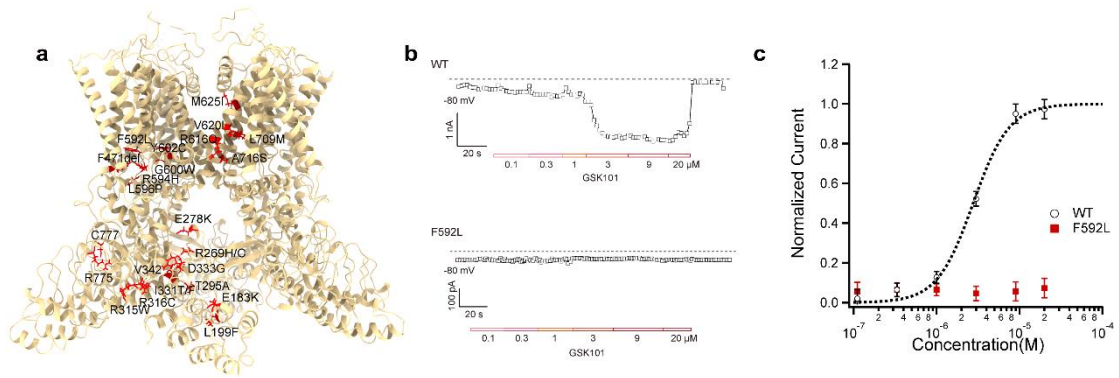

280 **Figure S11. Structural mapping of TRPV4 disease mutations.** **a** The locations of the  
 281 mutations relative to the domains of mTRPV4<sub>apo</sub> for autosomal-dominant brachyolmia,  
 282 spondylometaphyseal dysplasia, Kozlowski type, and metatropic dysplasia. **b**  
 283 Representative current recordings of WT and mutant F592L, where GSK101 activation is  
 284 abolished at -80 mV. **c** Concentration-response curves of GSK101 activation of WT and  
 285 F592L from the membrane in whole-cell patch-clamp recordings (n = 3–4 cells). Data  
 286 presented as mean ± s.e.m.

287

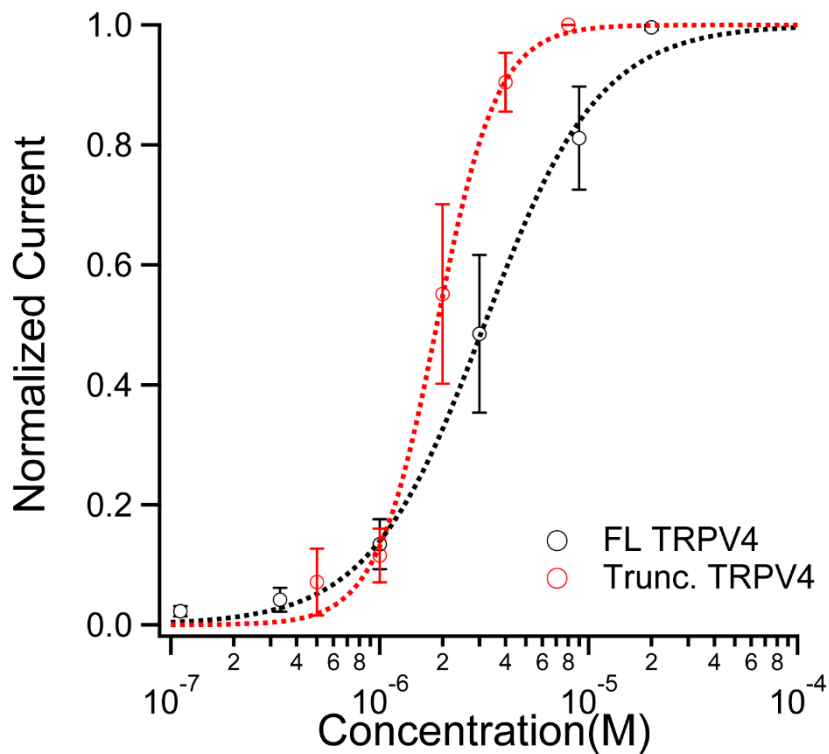

288 **Figure S12. Electrophysiological characterization of full-length and truncated**  
 289 **mTRPV4 channels.** Concentration-response curves of GSK101 activation of full-length  
 290 and truncated mTRPV4 channels from the membrane in whole-cell patch-clamp recordings  
 291 (n = 5–8 cells). Data presented as mean ± s.e.m.

## Cryo-EM data collection, refinement and validation statistics

|                                                        | mTRPV4           | mTRPV4                | mTRPV4                | mTRPV4                | mTRPV4                |
|--------------------------------------------------------|------------------|-----------------------|-----------------------|-----------------------|-----------------------|
|                                                        | apo              | GSK101                | GSK101_RR             | Agonist1_RR           | RN1747                |
| <b>Data collection and processing</b>                  | mTRPV4           | mTRPV4                | mTRPV4                | mTRPV4                | mTRPV4                |
|                                                        | apo              | GSK101                | GSK101_RR             | Agonist1_RR           | RN1747                |
| Magnification                                          | 49,310×          | 49,310×               | 49,310×               | 49,310×               | 49,310×               |
| Voltage (kV)                                           | 300              | 300                   | 300                   | 300                   | 300                   |
| Electron exposure<br>(e <sup>-</sup> /Å <sup>2</sup> ) | ~52              | ~52                   | ~52                   | ~52                   | ~52                   |
| Defocus range (μm)                                     | -0.8 to -1.6     | -0.8 to -1.6          | -0.8 to -1.6          | -0.8 to -1.6          | -0.8 to -1.6          |
| Pixel size (Å)                                         | 0.93             | 0.93                  | 0.93                  | 0.93                  | 0.93                  |
| Symmetry imposed                                       | C4               | C4                    | C4                    | C4                    | C4                    |
| Initial particle images (no.)                          | 2,812,534        | 2,392,714             | 2,296,249             | 1,527,550             | 622,583               |
| Final particle images (no.)                            | 201,371          | 452,263               | 334,401               | 428,608               | 74,344                |
| Map resolution (Å)                                     | 3.59             | 3.62                  | 3.72                  | 3.88                  | 3.79                  |
| FSC threshold                                          | 0.143            | 0.143                 | 0.143                 | 0.143                 | 0.143                 |
| <b>Refinement</b>                                      |                  |                       |                       |                       |                       |
| Initial model used<br>(PDB code)                       | hTRPV4<br>(7AA5) | mTRPV4 <sub>apo</sub> | mTRPV4 <sub>apo</sub> | mTRPV4 <sub>apo</sub> | mTRPV4 <sub>apo</sub> |
| Model resolution (Å)                                   | 3.4              | 3.4                   | 3.5                   | 3.8                   | 3.8                   |
| FSC threshold                                          | 0.143            | 0.143                 | 0.143                 | 0.143                 | 0.143                 |
| Map sharpening B factor (Å <sup>2</sup> )              | -106             | -135                  | -111                  | -143                  | -150                  |
| Model composition                                      |                  |                       |                       |                       |                       |
| Non-hydrogen atoms                                     | 20,200           | 19,124                | 19,412                | 19,144                | 18,924                |
| Protein residues                                       | 2,516            | 2,516                 | 2,516                 | 2,356                 | 2,344                 |
| Ligands                                                | 0                | 4                     | 5                     | 5                     | 0                     |
| B factors (Å <sup>2</sup> )                            |                  |                       |                       |                       |                       |
| Protein                                                | 26.71            | 101.65                | 75.39                 | 118.84                | 120.25                |
| Ligand                                                 |                  | 94.99                 | 53.68                 | 110.93                |                       |
| R.m.s. deviations                                      |                  |                       |                       |                       |                       |
| Bond lengths (Å)                                       | 0.003            | 0.004                 | 0.005                 | 0.005                 | 0.004                 |
| Bond angles (°)                                        | 0.594            | 0.967                 | 1.279                 | 1.032                 | 0.948                 |
| Validation                                             |                  |                       |                       |                       |                       |
| MolProbity score                                       | 2.23             | 2.07                  | 2.35                  | 2.42                  | 2.14                  |
| Clashscore                                             | 14.55            | 13.50                 | 18.75                 | 20.72                 | 16.09                 |
| Poor rotamers (%)                                      | 0.09             | 0.00                  | 0.19                  | 0.19                  | 0.00                  |
| Ramachandran plot                                      |                  |                       |                       |                       |                       |
| Favored (%)                                            | 89.72            | 93.41                 | 88.88                 | 87.48                 | 93.45                 |
| Allowed (%)                                            | 9.36             | 6.41                  | 10.09                 | 12.00                 | 6.38                  |
| Disallowed (%)                                         | 0.92             | 0.17                  | 1.02                  | 0.52                  | 0.17                  |



294 **Supplementary information, Table S2**  
 295 **EC50 values of GSK101 activation of TRPV4 and its mutants.**

| Mutant           | EC50 ( $\mu\text{M}$ ) | n |
|------------------|------------------------|---|
| TRPV4 WT         | $1.6 \pm 0.2$          | 5 |
| TRPV4 WT(-80 mV) | $2.8 \pm 0.2$          | 4 |
| Trunc. TRPV4     | $1.9 \pm 0.1$          | 5 |
| S470A            | $6.4 \pm 0.2$          | 3 |
| F524A            | $6.6 \pm 0.1$          | 3 |
| T527Q            | $0.5 \pm 0.1$          | 5 |
| F549S            | $3.5 \pm 1.3$          | 5 |

296  
 297 **Supplementary information, Table S3**  
 298 **IC50 values of Ruthenium red inhibition of TRPV4 and its mutants.**

| Mutant   | EC50 ( $\mu\text{M}$ ) | n | Current activated by 2 $\mu\text{M}$ GSK101 |
|----------|------------------------|---|---------------------------------------------|
| TRPV4 WT | $0.3 \pm 0.1$          | 3 | $3.2 \pm 1.2$                               |
| T677A    | $0.8 \pm 0.1$          | 4 | $2.3 \pm 0.4$                               |
| I678A    | $0.6 \pm 0.1$          | 3 | $3.5 \pm 1.3$                               |
| G679A    | $0.6 \pm 0.1$          | 3 | $3.6 \pm 1.3$                               |
| M680A    | $0.7 \pm 0.2$          | 3 | $1.8 \pm 0.2$                               |
| G681A    | $0.1 \pm 0.1$          | 3 | $3.5 \pm 1.1$                               |
| D682A    | $15.6 \pm 3.2$         | 3 | $5.3 \pm 1.2$                               |

299  
 300 **Supplementary information, Table S4**  
 301 **EC50 values of TRPV4 agonist-1 activation of TRPV4 and its mutants.**

| Mutant   | EC50 ( $\mu\text{M}$ ) | n |
|----------|------------------------|---|
| TRPV4 WT | $0.4 \pm 0.1$          | 4 |
| S470A    | $2.1 \pm 0.1$          | 3 |
| S470R    | $1.1 \pm 0.1$          | 4 |
| N474A    | $1.6 \pm 0.1$          | 4 |
| Y478A    | $1.0 \pm 0.1$          | 3 |
| T527Q    | $1.8 \pm 0.1$          | 3 |
| Y553F    | $2.1 \pm 0.2$          | 3 |
| F592A    | $1.7 \pm 0.1$          | 3 |
| F592S    | $1.0 \pm 0.1$          | 3 |
| F592Q    | $1.0 \pm 0.1$          | 3 |

302 **Supplementary information, Table S5**  
 303 **EC50 values of RN-1747 activation of TRPV4 and its mutants.**

| Mutant   | EC50 ( $\mu\text{M}$ ) | n |
|----------|------------------------|---|
| TRPV4 WT | 7.5 $\pm$ 0.2          | 3 |
| S470A    | 7.0 $\pm$ 0.2          | 3 |
| F524A    | 5.8 $\pm$ 0.1          | 3 |
| F549S    | 7.1 $\pm$ 0.3          | 4 |

304 **Supplementary information, Table S6**  
 305 **Primers used to generate TRPV4 mutations.**

| Name         | Primer-Forward                     | Primer-Reverse                    |
|--------------|------------------------------------|-----------------------------------|
| <b>S470A</b> | AAGTTTGGGGCTGTGGCCTTCTACA<br>TCAAC | GGCCACAGCCCCAACTTACGCCA<br>CTTG   |
| <b>S470F</b> | AAGTTTGGGGCTGTGTTCTTCTACA<br>TCAAC | GAACACAGCCCCAACTTACGCCA<br>CTTG   |
| <b>S470R</b> | AAGTTTGGGGCTGTGCGCTTCTACA<br>TCAAC | GCGCACAGCCCCAACTTACGCCA<br>CTTGTC |
| <b>N474A</b> | GTGTCCTTCTACATCGCCGTGGTCT<br>CCT   | GGCGATGTAGAAGGACACAGCCCC<br>AAAC  |
| <b>N474S</b> | GTGTCCTTCTACATCAGCGTGGTCT<br>CCT   | GCTGATGTAGAAGGACACAGCCCC<br>AAAC  |
| <b>N474Q</b> | GTGTCCTTCTACATCGTTGTGGTCT<br>CCT   | AACGATGTAGAAGGACACAGCCCC<br>AAAC  |
| <b>N474F</b> | GTGTCCTTCTACATCTTCGTGGTCT<br>CCT   | GAAGATGTAGAAGGACACAGCCCC<br>AAAC  |
| <b>S477A</b> | TACATCAACGTGGTTCGCTATCTGT<br>GTG   | GGCGACCACGTTGATGTAGAAGGA<br>CACA  |
| <b>S477Q</b> | TACATCAACGTGGTCCAATATCTGT<br>GTG   | TTGGACCACGTTGATGTAGAAGGAC<br>ACA  |
| <b>S477F</b> | TACATCAACGTGGTCTTCTATCTGT<br>GTG   | GAAGACCACGTTGATGTAGAAGGA<br>CACA  |
| <b>Y478A</b> | ATCAACGTGGTCTCCGCTCTGTGTG<br>CCA   | AGCGGAGACCACGTTGATGTAGAA<br>GGAC  |
| <b>Y478S</b> | ATCAACGTGGTCTCCAGTCTGTGTG<br>CCA   | ACTGGAGACCACGTTGATGTAGAA<br>GGAC  |
| <b>Y478F</b> | ATCAACGTGGTCTCCTTCTGTGTG<br>CCA    | AAAGGAGACCACGTTGATGTAGAA<br>GGAC  |
| <b>F524A</b> | TTCACAGGAGTCCTGGCCTTCTTTA<br>CCA   | GGCCAGGACTCCTGTGAAGAGCGT<br>GATG  |
| <b>F524S</b> | TTCACAGGAGTCCTGTCTTTCTTTA<br>CCA   | AGACAGGACTCCTGTGAAGAGCGT<br>GATG  |
| <b>T527A</b> | GTCCTGTTCTTCTTTGCCAGTATCA<br>AAG   | GGCAAAGAAGAAGGACTCCTGT<br>GAAG    |

|              |                                       |                                       |
|--------------|---------------------------------------|---------------------------------------|
| <b>T527Q</b> | GTCCTGTTCTTCTTTCAAAGTATCAA<br>AG      | TTGAAAGAAGAACAGGACTCCTGT<br>GAAG      |
| <b>F549A</b> | TTCGTCGATGGCTCCGCCAGTTAC<br>TCT       | GGCGGAGCCATCGACGAAGAGAGA<br>ATTC      |
| <b>F549S</b> | TTCGTCGATGGCTCCTCCCAGTTAC<br>TCT      | GGAGGAGCCATCGACGAAGAGAGA<br>ATTC      |
| <b>Q550A</b> | GTCGATGGCTCCTTCGCGTTACTCT<br>ACT      | CGCGAAGGAGCCATCGACGAAGAG<br>AGAA      |
| <b>Q550S</b> | GTCGATGGCTCCTTCTCGTTACTCT<br>ACT      | CGAGAAGGAGCCATCGACGAAGAG<br>AGAA      |
| <b>Q550N</b> | GTCGATGGCTCCTTCAACTTACTCT<br>ACT      | GTTGAAGGAGCCATCGACGAAGAG<br>AGAA      |
| <b>Q550F</b> | GTCGATGGCTCCTTCTTCTTACTCT<br>ACT      | GAAGGAGCCATCGACGAAGAGAGA<br>ATTC      |
| <b>Y553A</b> | TCCTTCCAGTTACTCGCCTTCATCTA<br>CT      | GGCGAGTAACTGGAAGGAGCCATC<br>GACG      |
| <b>Y553S</b> | TCCTTCCAGTTACTCTCCTTCATCTA<br>CT      | GGAGAGTAACTGGAAGGAGCCATC<br>GACG      |
| <b>Y553F</b> | TCCTTCCAGTTACTCTTCTTCATCTA<br>CT      | GAAGAGTAACTGGAAGGAGCCATC<br>GACG      |
| <b>Y591A</b> | TGGATGAATGCGCTGGCCTTCACG<br>CGCG      | GGCCAGCGCATTTCATCCAGCCCAG<br>GACC     |
| <b>Y591S</b> | TGGATGAATGCGCTGTCCTTCACGC<br>GCG      | GGACAGCGCATTTCATCCAGCCCAG<br>GACC     |
| <b>Y591F</b> | TGGATGAATGCGCTGTTCTTCACGC<br>GCG      | GAACAGCGCATTTCATCCAGCCCAG<br>GACC     |
| <b>F592A</b> | AATGCGCTGTACGCCACGCGCGGG<br>TTGAAGCTG | GTGGCGTACAGCGCATTTCATCCAG<br>CCCAGGAC |
| <b>F592S</b> | AATGCGCTGTACTCCACGCGCGGG<br>TTGAAGCTG | GTGGAGTACAGCGCATTTCATCCAGC<br>CCAGGAC |
| <b>F592Q</b> | AATGCGCTGTACCAGACGCGCGGG<br>TTGAAGCTG | GTCTGGTACAGCGCATTTCATCCAGC<br>CCAGGAC |
| <b>T677A</b> | GACCTCTTCAAGCTCGCCATCGGC<br>ATGG      | GGCGAGCTTGAAGAGGTCCAGGAG<br>GAAG      |
| <b>I678A</b> | CTCTTCAAGCTCACCGCCGGCATG<br>GGAG      | GGCGGTGAGCTTGAAGAGGTCCAG<br>GAGG      |
| <b>G679A</b> | TTCAAGCTCACCATCGCCATGGGA<br>GACC      | GGCGATGGTGAAGAGGTCCAGG<br>CAGG        |
| <b>M680A</b> | AAGCTCACCATCGGCGCGGGAGAC<br>CTGG      | CGCGCCGATGGTGAAGAGGTCCAG<br>GTCC      |
| <b>G681A</b> | CTCACCATCGGCATGGCAGACCTG<br>GAGA      | TGCCATGCCGATGGTGAAGAGGTCCAG<br>GAGG   |
| <b>D682A</b> | ACCATCGGCATGGGAGCCCTGGAG<br>ATGC      | GGCTCCCATGCCGATGGTGAAGAGGT<br>GAAG    |

|              |                                  |                                  |
|--------------|----------------------------------|----------------------------------|
| <b>D743A</b> | GCCACCACCATCCTGGCCATCGAG<br>CGTT | GGCCAGGATGGTGGTGGCCCACTG<br>CAAC |
| <b>D743E</b> | GCCACCACCATCCTGGAAATCGAG<br>CGTT | TTCCAGGATGGTGGTGGCCCACTG<br>CAAC |
| <b>D743R</b> | GCCACCACCATCCTGCGCATCGAG<br>CGTT | GCGCAGGATGGTGGTGGCCCACTG<br>CAAC |
| <b>I744A</b> | ACCACCATCCTGGACGCCGAGCGT<br>TCCT | GGCGTCCAGGATGGTGGTGGCCCA<br>CTGC |
| <b>I744F</b> | ACCACCATCCTGGACTTCGAGCGTT<br>CCT | GAAGTCCAGGATGGTGGTGGCCCA<br>CTGC |
| <b>S747A</b> | CTGGACATCGAGCGTGCCTTCCCT<br>GTGT | GGCAGCTCGATGTCCAGGATGGT<br>GGTG  |
| <b>S747R</b> | CTGGACATCGAGCGTCGCTTCCCT<br>GTGT | GCGACGCTCGATGTCCAGGATGGT<br>GGTG |
| <b>S747F</b> | CTGGACATCGAGCGTTTCTTCCCTG<br>TGT | GAAACGCTCGATGTCCAGGATGGT<br>GGTG |
